# Supplementary material for: Homocitrullination of lysine residues mediated by myeloid-derived suppressor cells in the tumor environment is a target for cancer immunotherapy
Source: PubMed Central journal article supplement — J Immunother Cancer. 2021 Jul 28;9(7):e001910. doi: 10.1136/jitc-2020-001910 (PMC8320257; doi:10.1136/jitc-2020-001910), 2021-07-28
Supplement: jitc-2020-001910supp001.pdf [file jitc-2020-001910supp001.pdf]

**Supplementary Data**

Figure S1

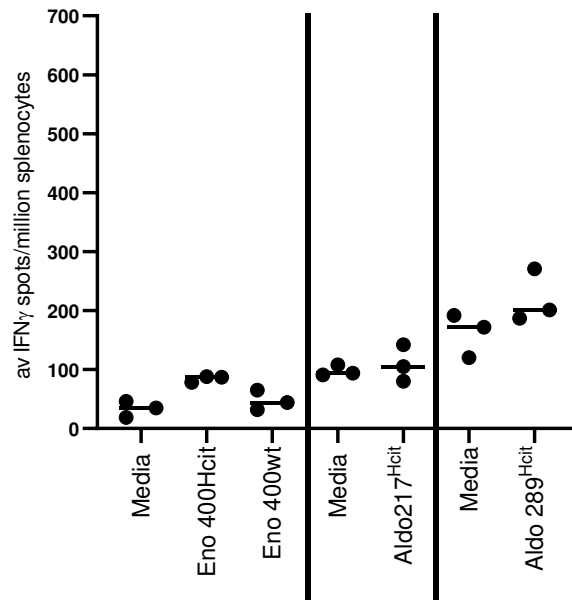

Figure S1. Immunogenicity of Hcit peptides in HLA-DP4 transgenic mice does not correlate with predicted MHCII binding affinity and not all peptides stimulate IFN $\gamma$  responses. *Ex vivo* ELISpot was used to assess IFN $\gamma$  responses to peptides in HLA-HHDII/DP4 mice. For all studies mice were immunized with three doses of peptide with CpG/MPLA as an adjuvant and responses were assessed at day 21.

Figure S2

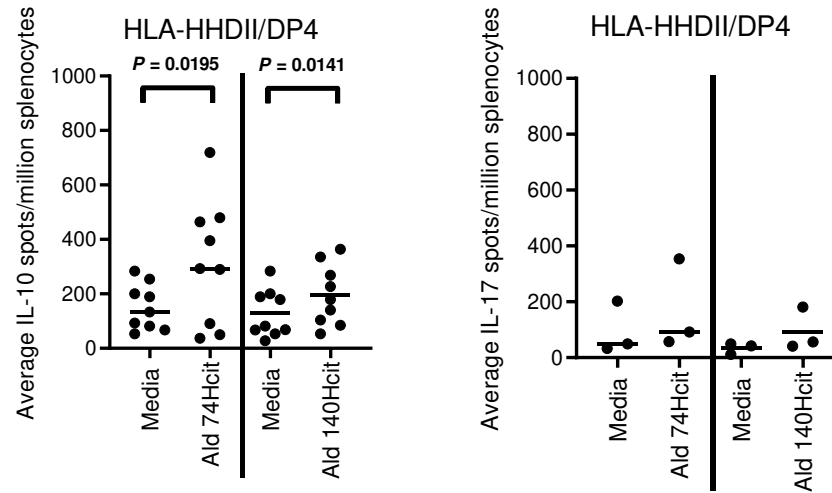

Figure S2. Homocitrullinated aldolase responses are Th1 phenotype.

*Ex vivo* ELISpot was used to assess IL-10 (A) and IL-17 (B) responses to aldolase peptides in HLA-HHDII/DP4 mice. For all studies mice were immunized with three doses of peptide with CpG/MPLA as an adjuvant and responses were assessed at day 21. Significant *P* values are shown for peptide compared to media only control stimulation.

Figure S3

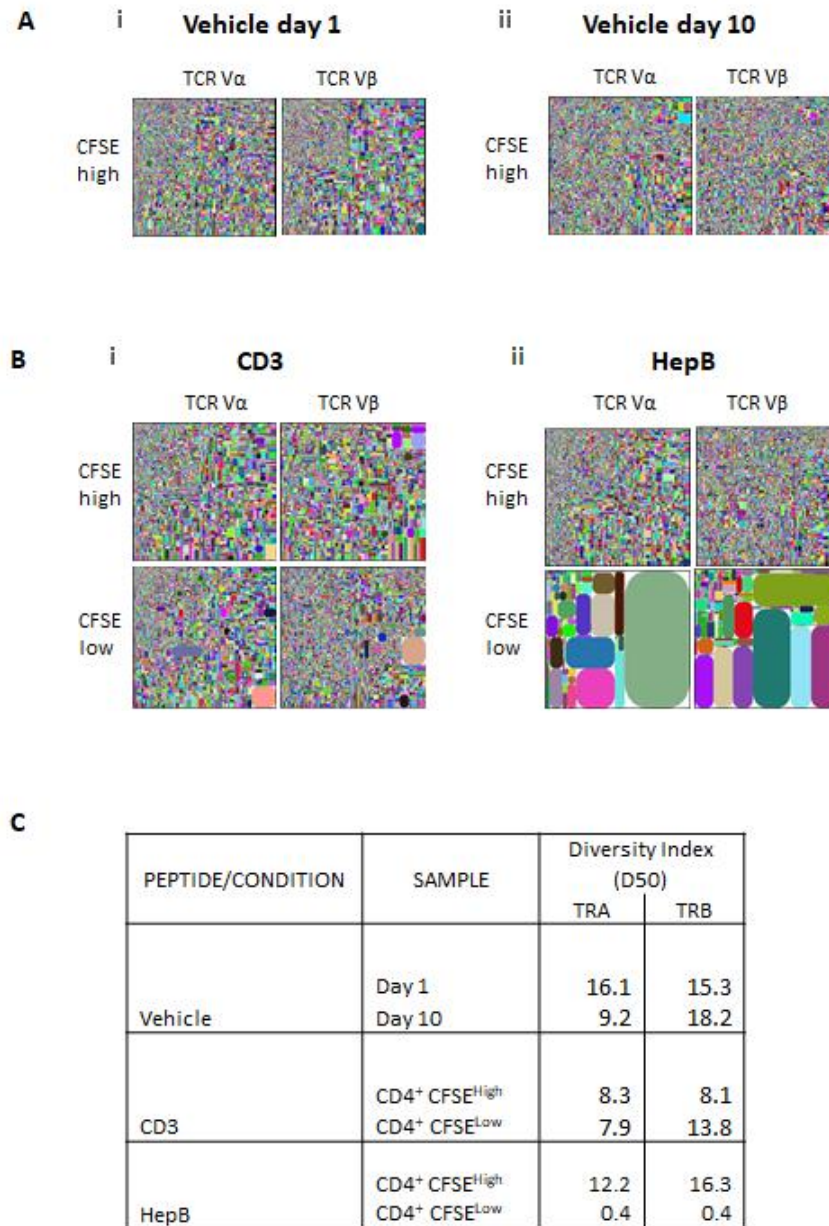

Figure S3. TCR $\alpha$  and  $\beta$  CDR3 tree maps for non-proliferating vehicle (media) only control (A), proliferating and non-proliferating CD4<sup>+</sup> cells in response to anti-CD3 polyclonal stimulus and stimulation with Hepatitis B peptide epitope (B). Diversity index was calculated for each condition (C).

Figure S4

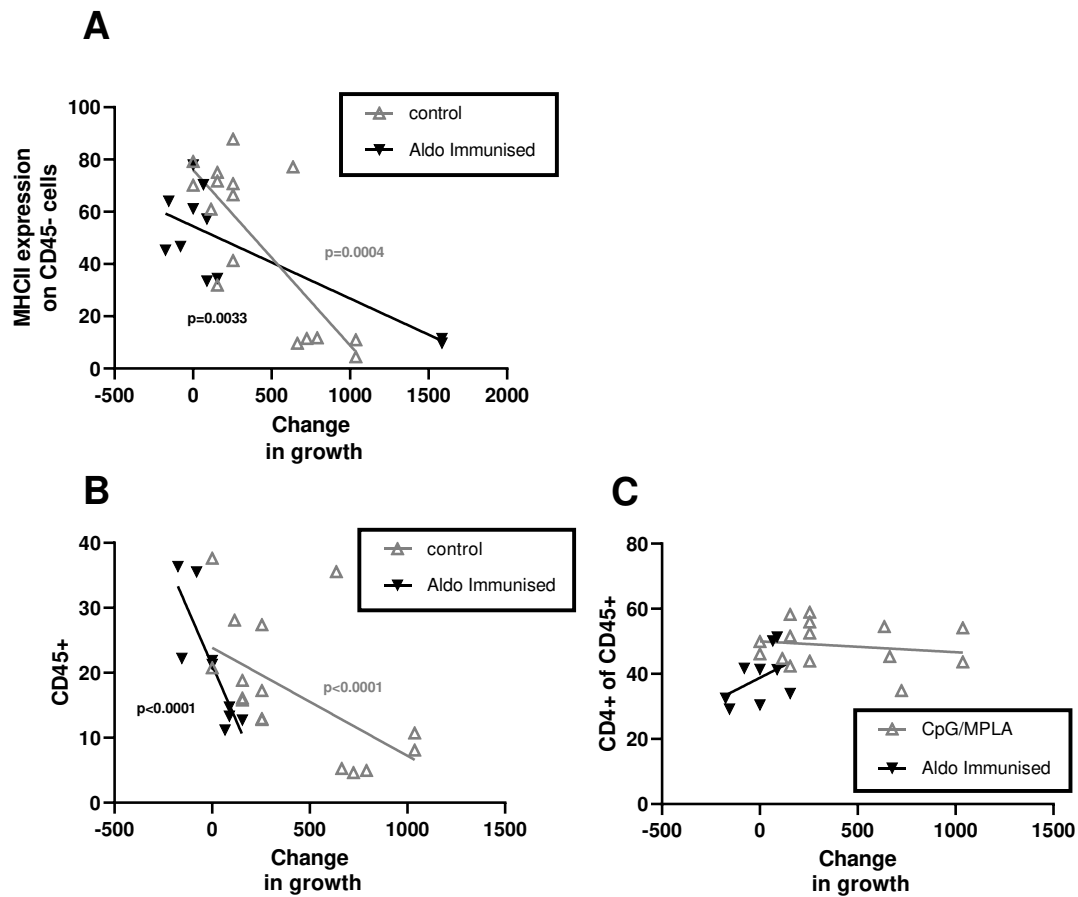

Figure S4. Correlation of change in tumour volume between time of immunization and tumour analysis and MHCII expression on CD45- cells (A) or CD45 (B) and CD4 (C) cell infiltrates. MHCII expression on CD45- cells includes all tumors, whereas the two immunized mice which showed no regression were excluded from further analysis due to lack of immune response as shown by minimal MHCII expression. Correlation was assessed by linear regression analysis and significant *P* values are shown.

Figure S5

**A MDSC gating**

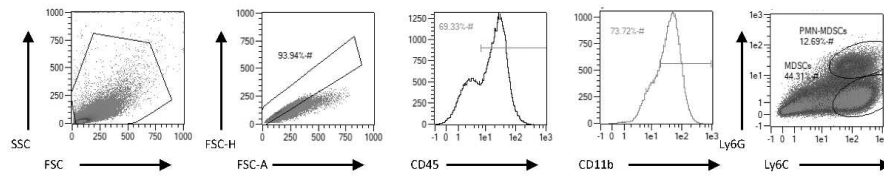

**B MPO FMO control**

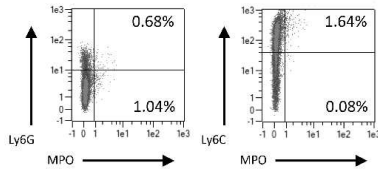

**C Full staining panel**

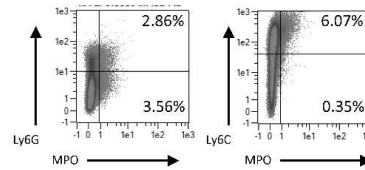

**D MDSC gating on TILs**

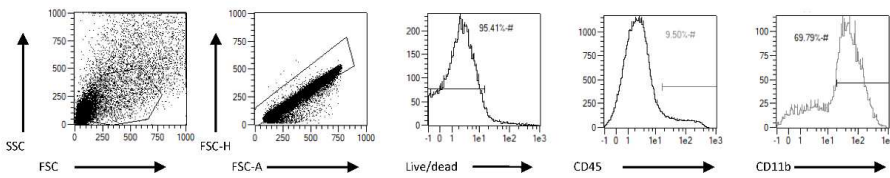

**E MPO Full panel**

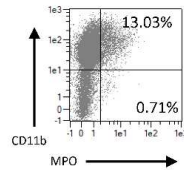

**Fc block control**

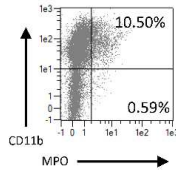

**MPO FMO control**

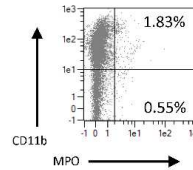

**F MHC II FMO control**

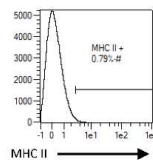

**MHC II on CD45-**

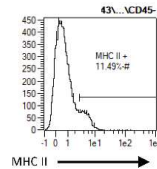

**T cell staining**

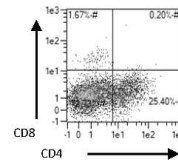

Figure S5. Example gating strategy for MDSCs

For MDSC analysis sequential gating was performed as shown (A), examples taken from *in vitro* grown MDSCs. FSC/SSC gated cells were doublet excluded using FSC-A/FSC-H gating. Events were then gated to include CD45+ then CD11b+ cells. MDSC populations were identified based on the combination of Ly6G and Ly6C. Fluorescent minus one (FMO) control shows Ly6C or Ly6G staining versus MPO on CD45/CD11b gated cells from MPO FMO (B) or fully stained samples (C). When analyzing TILs gating strategy was adapted to include live/dead gating (D) and Fc blocking was performed to confirm the specificity of the staining (E). Live/CD45- cells were assessed for MHC II staining compared to FMO control, and live/CD45+ cells for the presences of CD4 and CD8 (F).

Table S1. Peptide sequences.

| Epitope                     | Sequence<br>Human (Mouse)                                  | IEDB predicted binding<br>scores for wild type proteins |       |       | WT DP4 predicted core regions   |
|-----------------------------|------------------------------------------------------------|---------------------------------------------------------|-------|-------|---------------------------------|
|                             |                                                            | DP4                                                     | DR1   | DR4   |                                 |
| <b>Aldolase</b>             |                                                            |                                                         |       |       |                                 |
| Aldo74-93 <sup>Hcit</sup>   | IGGVILFHETLYQ- <b>hcit</b> -ADDGRP                         | 2.51                                                    | 33.91 | 30.22 | FHETLYQKA, LFHETLYQK            |
| Aldo140-157 <sup>Hcit</sup> | <b>hcit</b> -DGADFA- <b>hcit</b> -WRCVL- <b>hcit</b> -IGEH | 22.1                                                    | 59.86 | 49.8  | FAKWRCVLK, AKWRCVLKI, DFAKWRCVL |
| Aldo217-235 <sup>Hcit</sup> | LSDHHI(V)YLEGTL- <b>Hcit</b> -PNMVT                        | 4.92                                                    | 13.4  | 4.87  | YLEGTLTKP, IYLEGTLTK            |
| Aldo238-256 <sup>Hcit</sup> | HACTQ- <b>hcit</b> -FSH(N)EEIAMATVTA                       | 13.18                                                   | 46.73 | 4.11  | TQKFSHEEI, KFSHEEIAM            |
| Aldo289-307 <sup>Hcit</sup> | <b>Hcit</b> -CPLL- <b>Hcit</b> -PWALTFYGRALQ               | 14.38                                                   | 24.99 | 11.15 | KPWALTFY, LLKPWALTF             |
| <b>BIP</b>                  |                                                            |                                                         |       |       |                                 |
| BIP328-346 <sup>Hcit</sup>  | EELNMDLFRSTM- <b>hcit</b> -PVQ- <b>hcit</b> -VL            | 19.99                                                   | 28.99 | 6.65  | LFRSTMKPV, FRSTMKPVQ            |
| Bip562-579 <sup>Hcit</sup>  | RNELESYAYSL- <b>hcit</b> -NQIGD- <b>hcit</b>               | 21.01                                                   | 32.43 | 12.81 | LESYAYSLK, YAYSLKNQI            |
| <b>Enolase</b>              |                                                            |                                                         |       |       |                                 |
| Eno156-176 <sup>Hcit</sup>  | GSHAGN- <b>hcit</b> -LAMQEFMILPVGAA(S)                     | 1.2                                                     | 34.28 | 12.67 | KLAMQEFMI, HAGNKLAMQ            |
| Eno400-420 <sup>Hcit</sup>  | RSERLA- <b>Hcit</b> -YNQLLRIEEELGS                         | 11.8                                                    | 42.27 | 23.15 | RLAKYNQLL, AKYNQLLRI            |
| <b>Cyk8</b>                 |                                                            |                                                         |       |       |                                 |
| Cyk371-388 <sup>Hcit</sup>  | LREYQELMNV- <b>hcit</b> -LALDIEI                           | 24.36                                                   | 6.74  | 4.42  | LMNVKLALD, ELMNVKLAL            |
| <b>HepB</b>                 |                                                            |                                                         |       |       |                                 |
| HepB181-192                 | GFFLLTRILTIQ                                               | 7.01                                                    | 5.6   | 1.2   | FLLTRILTI                       |

Analysis is based on human sequences.

Where human and mouse sequences are not homologous, amino acids found in mouse sequences are shown in parenthesis.

Table S2. Healthy donor and patient data.  
Healthy Donor

## Healthy Donors

| ID     | Smoking status | HLA type           |                    |                    |                       |                       |                  |                                          |                       |
|--------|----------------|--------------------|--------------------|--------------------|-----------------------|-----------------------|------------------|------------------------------------------|-----------------------|
| BD0001 | Non-smoker     | HLA A:<br>*02, *32 | HLA B<br>*08, *44  | HLA C:<br>*04, *07 | HLA DRB1:<br>*03, *07 | HLA DRB3:<br>*01      | HLA DRB4:<br>*01 | HLA DQA1: *02, *05<br>HLA DQB1: *01      | HLA DPB1:<br>*04      |
| BD0002 | Non-smoker     | HLA A:<br>*02, *29 | HLA B<br>*44, *51  |                    | HLA DRB1:<br>*04, *13 | HLA DRB3:<br>*01      | HLA DRB4:<br>*01 | HLA DQB1: *03, *06                       | HLA DPB1:<br>*04      |
| BD0007 | Non-smoker     | HLA A:<br>*01, *32 | HLA B<br>*08, *15  | HLA C:<br>*07      | HLA DRB1:<br>*03, *13 | HLA DRB3:<br>*01, *03 | -                | HLA DQB1:<br>*02, *06                    | HLA DPB1:<br>*04      |
| BD0010 | Non-smoker     | HLA A:<br>*02, *11 | HLA B<br>*40, *44  | HLA C:<br>*03, *16 | HLA DRB1:<br>*13, *16 | HLA DRB3:<br>*03      | HLA DRB5:<br>*02 | HLA DQB1:<br>*05, *06                    | HLA DPB1:<br>*04, *10 |
| BD0014 | N/A            | N/A                |                    |                    |                       |                       |                  |                                          |                       |
| BD0015 | Non-smoker     | HLA A:<br>*03, *24 | HLA B:<br>*07, *15 | HLA C:<br>*03, *07 | HLA DRB1:<br>*04, *15 | HLA DRB4:<br>*01      | HLA DRB5:<br>*01 | HLA DQB1: *03, *06                       | HLA DPB1:<br>*04      |
| BD0016 | Ex-smoker      | HLA A:<br>*01, *02 | HLA B:<br>*8, *44  | HLA C:<br>*05, *07 | HLA DRB1:<br>*03, *15 | HLA DRB5:<br>*01      | HLA DRB3:<br>*02 | HLA DQB1: *02, *06                       | HLA DPB1:<br>*01, *04 |
| BD0017 | Non-smoker     | N/A                |                    |                    |                       |                       |                  |                                          |                       |
| BD0022 | Non-smoker     | HLA A:<br>*01, *02 | HLA B:<br>*35, *50 | HLA C:<br>*06, *12 | HLA DRB1:<br>*04, *07 | -                     | -                | HLA DQB1: *02, *03                       | HLA DPB1:<br>*02, *04 |
| BD0025 | Ex-smoker      | HLA A:<br>*02, *29 | HLA B:<br>*07, *57 | HLA C:<br>*06, *07 | HLA DRB1:<br>*01, *07 | HLA DRB4:<br>*01      | -                | HLA DQB1:<br>*03, *05                    | HLA DPB1:<br>*03, *13 |
| BD0038 | Non-smoker     | HLA A:<br>*26, *33 | HLA B:<br>*40, *58 | HLA C:<br>*03      | HLA DRB1:<br>*09, *11 | HLA DRB3:<br>*02      | HLA DRB4:<br>*01 | HLA DQB1: *03                            | HLA DPB1:<br>*04, *05 |
| BD0041 | Ex-smoker      | HLA A:<br>*01, *24 | HLA B:<br>*07, *40 | HLA C:<br>*03, *07 | HLA DRB1:<br>*04, *11 | -                     | -                | HLA DQB1: *03                            | HLA DPB1:<br>*02, *04 |
| BD0044 | Non-smoker     | N/A                |                    |                    |                       |                       |                  |                                          |                       |
| BD0051 | Non-smoker     | HLA A:<br>*11, *68 | HLA B:<br>*07, *15 | HLA C:<br>*05, *07 | HLA DRB1:<br>*11, *15 | -                     | -                | HLA DQB1: *06                            | HLA DPB1:<br>*04, *19 |
| BD0050 | Non-smoker     | HLA A:<br>*24, *26 | HLA B:<br>*35, *34 | HLA C:<br>*04, *06 | HLA DRB1:<br>*07, *11 | HLA DRB3:<br>*02      | HLA DRB4:<br>*01 | HLA DQA1: *02, *05<br>HLA DQB1: *02, *03 | HLA DPB1:<br>*02, *04 |
| BD0095 | Non-smoker     | N/A                |                    |                    |                       |                       |                  |                                          |                       |
| BD0150 | Non-smoker     | N/A                |                    |                    |                       |                       |                  |                                          |                       |



## Cancer patient

| ID   | Smoking status | Indication/Treatment                                                                |
|------|----------------|-------------------------------------------------------------------------------------|
| LG6  | Ex-smoker      | Lung adenocarcinoma/currently none, previous chemotherapy and checkpoint inhibitors |
| LG8  | Ex-smoker      | Lung adenocarcinoma/ Tyrosine Kinase inhibitor and Steroid                          |
| LG9  | Ex-smoker      | Lung adenocarcinoma/ Chemotherapy                                                   |
| LG10 | Smoker         | Lung adenocarcinoma/ Checkpoint inhibitor                                           |
| LG12 | Ex-smoker      | SCLC/Chemotherapy                                                                   |
| LG18 | Ex-smoker      | Lung adenocarcinoma/treatment naïve                                                 |
| LG19 | Ex-smoker      | Lung adenocacinoma/ checkpoint inhibitor                                            |
| OV19 | Unknown        | Ovarian serous adenocarcinoma (low grade)/ post surgery and pre systemic treatment  |
| OV21 | Unknown        | Ovarian serous adenocarcinoma/ Finished chemotherapy                                |
| OV22 | Unknown        | Peritoneal adenocarcinoma/ treatment naïve                                          |
| BR7  | Unknown        | Triple negative breast cacner                                                       |

Table S3. Details of antibodies used.

| Antibody target | Target species | Format        | Clone      | Supplier        | Dilution |
|-----------------|----------------|---------------|------------|-----------------|----------|
| CD45            | Mouse          | eFlour 450    | 30-F11     | Thermofisher    | 1/50     |
| CD11b           | Mouse          | PE-Cy7        | M1/70      | Thermofisher    | 1/50     |
| Ly6C            | Mouse          | APC           | HK1.4      | Thermofisher    | 1/50     |
| Ly6G            | Mouse          | FITC          | RB6-8C5    | Thermofisher    | 1/50     |
| MPO             | Mouse          | PE            | 8F4        | HyCult Biotech  | 1/10     |
| Homocitrulline  | N/A            | N/A           | Polyclonal | Cayman Chemical | 1/50     |
| Secondary       | Rabbit         | Alexa-647     | Polyclonal | Abcam           | 1/1000   |
| CD4             | Human          | Pe-Cy5        | RMC 4-5    | Thermofisher    | 1/50     |
| CD8             | Human          | eFlour 450    | 53-6.7     | Thermofisher    | 1/50     |
| HLA-DR/DP/DQ    | Human          | APC-Vio770    | REA332     | Miltenyi        | 1/50     |
| Ly6G            | Mouse          | purified      | 1A8        | Biolegend       | N/A      |
| Ly6C            | Mouse          | purified      | Monts      | BioXcell        | N/A      |
| CD4             | Human          | purified      | RPA-T4     | Abcam           | N/A      |
| CD4             | Human          | purified      | OKT-4      | BioXcell        | N/A      |
| CD8             | Mouse          | purified      | 2.4        | BioXcell        | N/A      |
| Live/dead       | N/A            | Zombie Yellow | N/A        | Biolegend       | 1/50     |
| Fc block        | Mouse          | N/A           | N/A        | Miltenyi        | 1/50     |
